# Supplementary material for: First evidence for the presence of amino acid sensing mechanisms in the fish gastrointestinal tract
Source: PubMed Central journal article supplement (PMC7925595; doi:10.1038/s41598-021-84303-9), 2021-03-02
Supplement: 41598_2021_84303_MOESM1_ESM.pdf [file 41598_2021_84303_MOESM1_ESM.pdf]

# **First evidence for the presence of amino acid sensing mechanisms in the fish gastrointestinal tract**

Jessica Calo<sup>1</sup>, Ayelén M. Blanco<sup>1\*</sup>, Sara Comesaña<sup>1</sup>, Marta Conde-Sieira<sup>1</sup>, Sofía  
Morais<sup>2</sup>, José L. Soengas<sup>1</sup>

<sup>1</sup> Laboratorio de Fisiología Animal, Departamento de Biología Funcional e Ciencias da Saúde, Facultade de Biología and Centro de Investigación Mariña-CIM, Universidade de Vigo, Vigo, Pontevedra, Spain.

<sup>2</sup> Lucta, Innovation Division, Autonomous University of Barcelona Research Park, Bellaterra, Spain

\* **Corresponding author:** Ayelén M. Blanco ([amblanco@uvigo.es](mailto:amblanco@uvigo.es))

ORCID: 0000-0002-7683-4154

**Supplementary Fig. S1.** Full-length images of agarose gels included in Figures 1 and 4. Molecular markers are included. See corresponding figure legends for details.

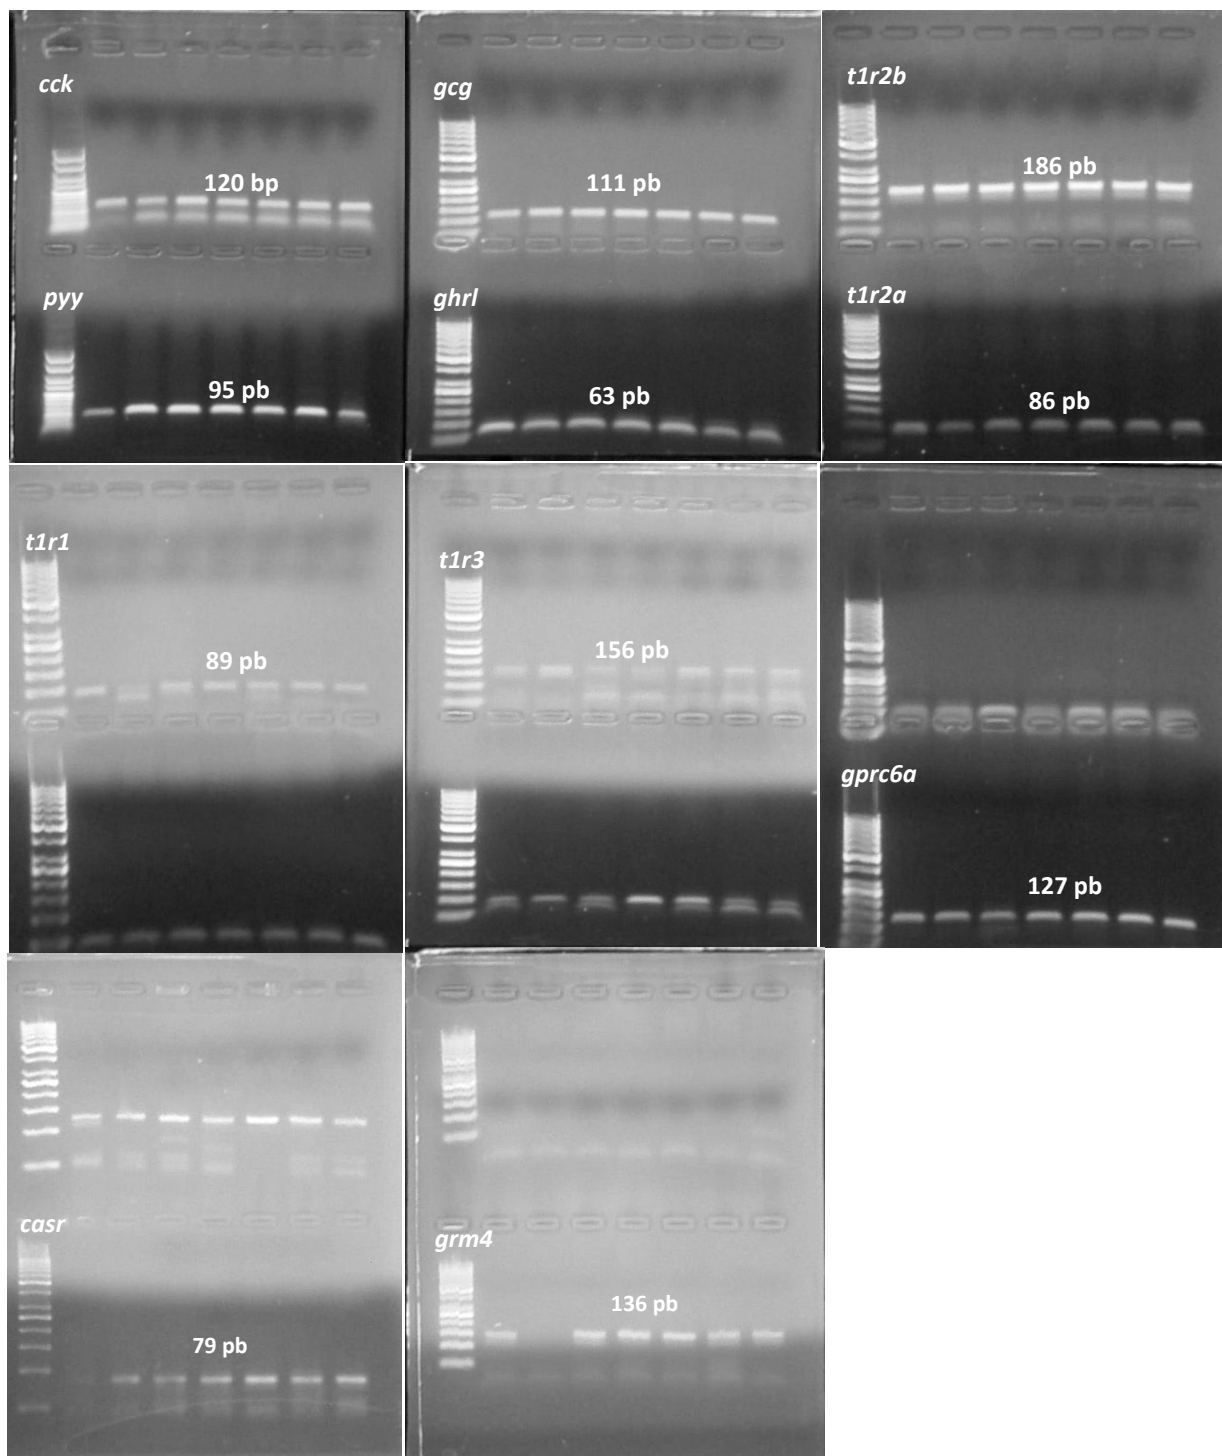

**Supplementary Fig. S2.** Full-length images of Western blots included in Figure 5 (e – h). Bands shown in Figure 5 (e – h) are boxed. For each protein, two separate blots containing in total of six samples per treatment were performed. Molecular markers are included. See corresponding figure legend for details.

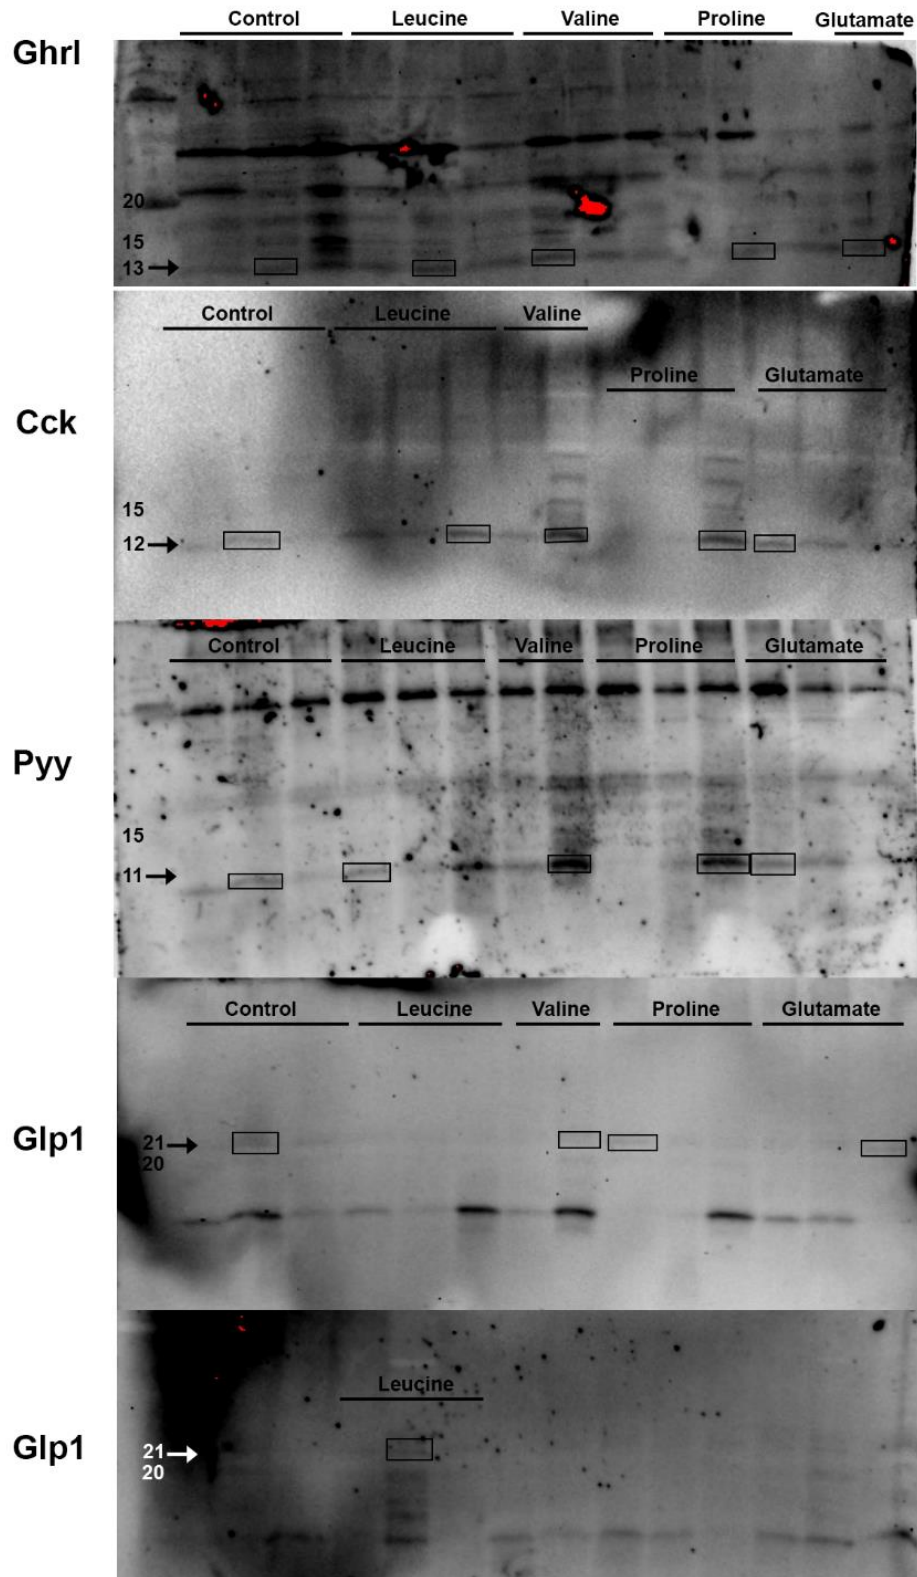

**Supplementary Fig. S3.** Effects of intragastric administration of 40  $\mu\text{mol/mL}$  of L-leucine, L-valine, L-proline or L-glutamate on the plasma levels of lactate (a), glucose (b) and  $\alpha$ -amino acids (c) in rainbow trout. Data are expressed as mean + SEM (n = 12). Statistical differences among groups were assessed by one-way ANOVA and post-hoc Student-Newman-Keuls test. Significant differences are denoted by the use of letters: bars sharing the same letter are not statistically significant, while if two bars have different letters they are significantly different ( $p < 0.05$ ).

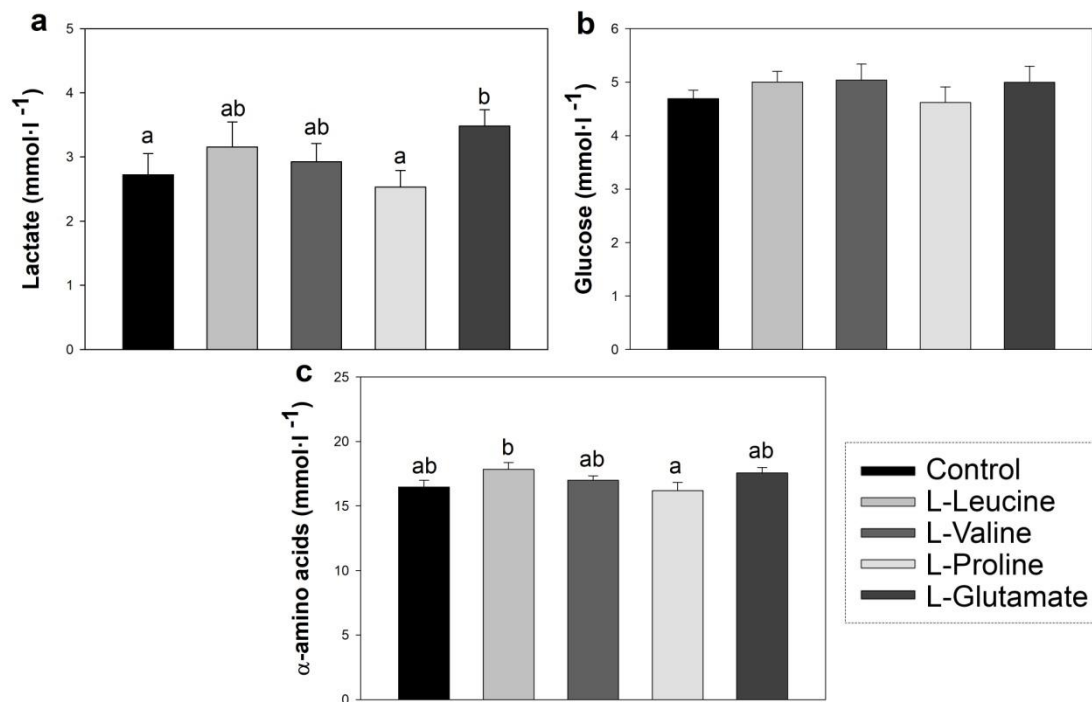

**Supplementary Fig. S4.** Schematic representation of the rainbow trout gastrointestinal tract, showing the regions in which it was divided for the experiments carried out in this study. The areas sampled within each region are squared.

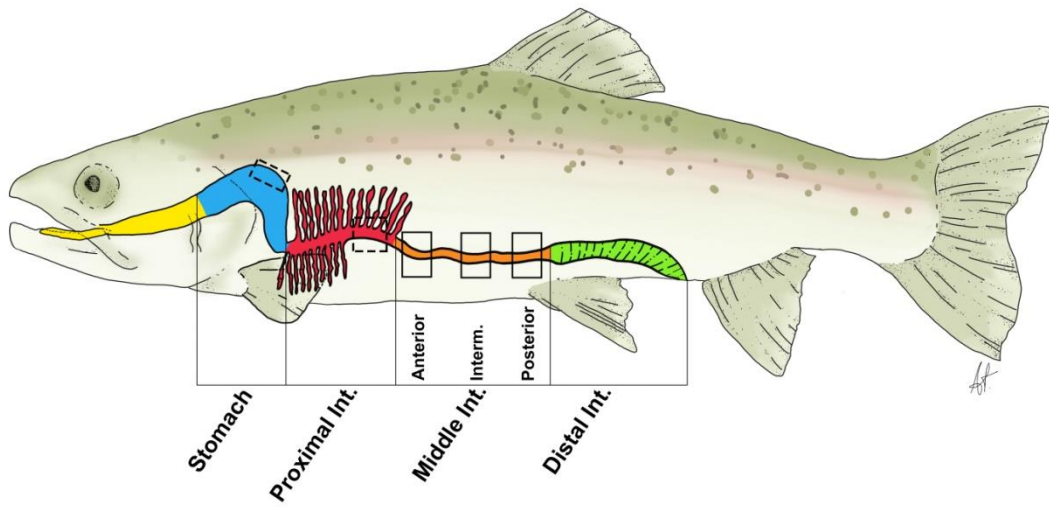

**Supplementary Fig. S5.** Full-length images of Western blots included in Figure 6. Molecular markers are included. See corresponding figure legend for details.

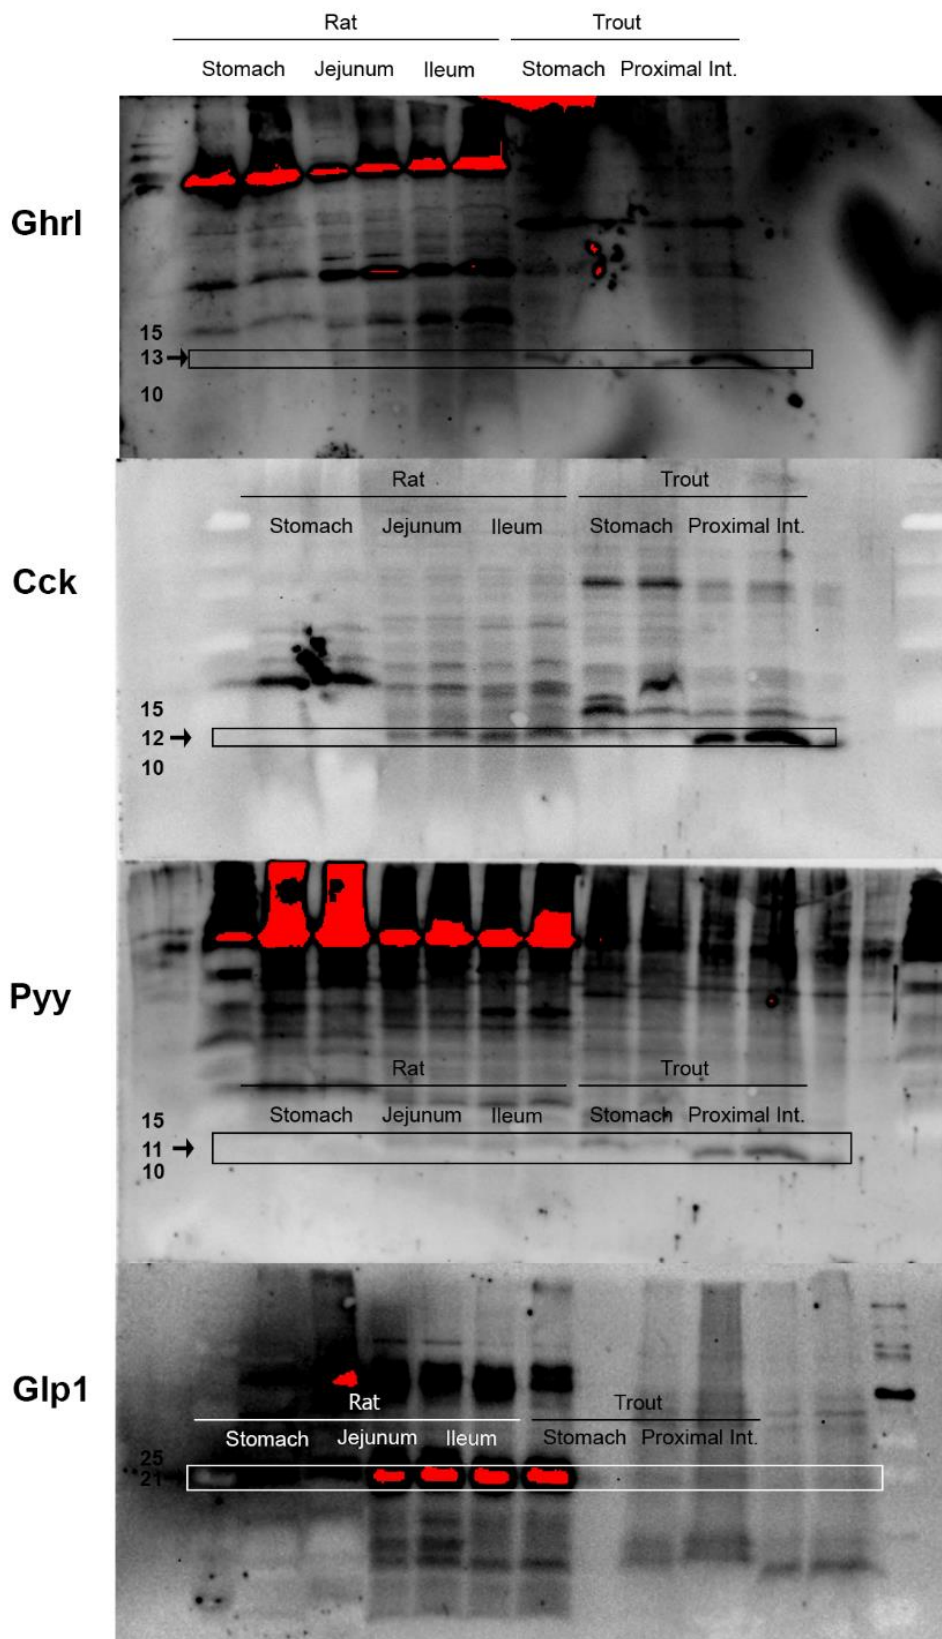

**Supplemental Table S1.** List of primers used during attempts to amplify *grm1*, *plcβ2* and *trpm5* in the gastrointestinal tract of rainbow trout.

| Gene         | GenBank accession number | Forward primer (5' to 3') | Reverse primer (5' to 3') |
|--------------|--------------------------|---------------------------|---------------------------|
| <i>grm1</i>  | XM_021600739.1           | CCCTGGAGCAGAGCATTGAGT     | CTTGGAGCCGTCCTTGTCATC     |
|              |                          | GCAGTACCGCTTCCAGTGCC      | TGCCTAGATCACCGGAGCAG      |
|              | XM_021583050.1           | AGCTGTTGCTGGATCTGTACGC    | CTCGTTGAAGTTGGCCGGG       |
|              |                          | GTTGTGCCCTCTGACACTCTC     | TCTTGTCTGAATGGGCGATAC     |
|              |                          | GGAGGTGACGTCTTTTGATGA     | GGGTGAGCTGGACACTGACTA     |
|              | XM_021600741.1           | ATGGGCAGATCGTGATGAGGT     | TTCCGTGAGTTGGTGTCCAAA     |
|              |                          | CAGGACAGTAAGATGGGCTTCG    | TGAGCAGGTAATCCAGCAGCTT    |
|              |                          | GCGTTTGGACACCAACTCAC      | ATTGCCTAGATCACCGGAGC      |
|              |                          | TGCTCCGGTGATCTAGGCAA      | ACATCCTCCCCTGATACCCC      |
|              | XM_021573769.1           | CCGCCTCAACACCAACACCA      | CCCATCTTACTGTCCTGGAC      |
| <i>plcb2</i> | XM_021584705.1           | GGATTGCTGGAAGGGAAAACC     | CGGGGTACTGTGACGTCTTGA     |
|              |                          | TGCCAGATGGTGGCGCTCAA      | CACCGCTCAGAATGTGCCTT      |
|              |                          | GCTGCCTGGAGCTGGATTGC      | CTTGAAGGCGCTTTCCGCGA      |
|              |                          | TGGCGCTCAACTACCAAAC       | CTTCTTGTCACTACGGCGGA      |
|              |                          | CCAGAGCCTGAACCCAACAT      | AGGGGTCAACTCTGTGGCTA      |
|              |                          | TCACTTCCTGTTGATCTGCGG     | AGCATGTCTACCCCAGGAAG      |
|              |                          | GCCAGAGTCAGGAAGCTCAGG     | TGTGGCTCTTAGCGATGTCCA     |
| <i>trpm5</i> | XM_021586867.1           | CAGGGCAACACAGACATCTTCT    | CCAGTTTGGCCAGATAGTTCTCC   |
|              |                          | ACTTTGCCTTCCTCATCCTGT     | GTTCCAGTTGTCCTCCACGTA     |

*grm1*, metabotropic glutamate receptor 1; *plcb2*, phospholipase C β2; *trpm5*, transient receptor potential cation channel subfamily M member 5
